# Supplementary material for: Glaucoma-causing ADAMTS17 mutations are also reproducibly associated with height in two domestic dog breeds: selection for short stature may have contributed to increased prevalence of glaucoma
Source: Canine Genet Epidemiol. 2019 May 17;6:5. doi: 10.1186/s40575-019-0071-6 (PMC6524303; doi:10.1186/s40575-019-0071-6)
Supplement: Supplementary file 2 — Raw data from SP measurements. (XLSX 18 kb) [file 40575_2019_71_MOESM2_ESM.xlsx]

## Sheet: Sheet1
Dog ID	POAG/PLL status	Height (stick)	Height (owner)	Height (cm)	Date of Birth	Gender	Date measured	Age
1	Affected		43.18	43.18	2011-11-25	F	2017-09-14	5.80424
2	Affected		35.56	35.56	2007-11-25	F	2017-09-14	9.80424
3	Affected		41.4	41.4	2013-01-26	F	2017-09-14	4.63244
4	Affected		44.45	44.45	2014-01-23	F	2017-10-18	3.73443
5	Affected	44	45.09	44	2011-11-25	F	2017-11-25	6.00137
6	Affected	44	43.18	44	2006-11-25	F	2017-11-25	11.0007
7	Affected	42.5	42.5	42.5	2014-02-15	F	2017-11-25	3.7755
8	Affected		48.26	48.26	2014-05-24	F	2017-12-06	3.5373
9	Affected	46.5		46.5	2010-08-12	M	2018-03-21	7.60575
10	Carrier		43.18	43.18	2016-08-25	F	2017-09-14	1.05407
11	Carrier		48.26	48.26	2013-05-25	F	2017-09-14	4.30664
12	Carrier		43.18	43.18	2014-05-25	F	2017-09-14	3.30732
13	Carrier		48.26	48.26	2010-11-25	M	2017-09-14	6.80356
14	Carrier		54.2	54.2	2015-11-30	F	2017-09-19	1.80424
15	Carrier	48		48	2012-05-24	M	2017-11-22	5.4976
16	Carrier		45.72	45.72	2016-10-15	F	2017-10-18	1.00753
17	Carrier		47.63	47.63	2016-04-23	M	2017-10-18	1.48665
18	Carrier	44.5	45.09	44.5	2016-10-31	F	2017-11-25	1.06776
19	Carrier	52.5	51.44	52.5	>1 year	M	2017-11-25
20	Carrier	47.5	46.99	47.5	>1 year	F	2017-11-25
21	Carrier	45	45.72	45	2015-10-25	F	2017-11-25	2.08624
22	Carrier	46	46	46	2013-09-15	F	2017-11-25	4.19439
23	Carrier	46	43.82	46	2016-11-11	F	2017-11-25	1.03765
24	Carrier	44.5	45.5	44.5	2013-11-25	F	2017-11-25	4
25	Carrier	50.5	49.53	50.5	2016-11-11	M	2017-11-25	1.03765
26	Carrier	47.5	48.26	47.5	2016-10-04	F	2017-11-25	1.14168
27	Carrier	49	48.5	49	2008-04-08	M	2017-11-25	9.63176
28	Carrier		48.9	48.9	>1 year	F	2017-11-25
29	Carrier		50.8	50.8	2016-03-13	M	2017-12-04	1.72758
30	Carrier		52	52	2007-02-01	M	2017-12-06	10.8446
31	Carrier		49	49	2015-01-01	F	2017-12-06	2.9295
32	Carrier		44.45	44.45	2014-10-13	F	2017-12-14	3.17043
33	Carrier		55.88	55.88	2011-09-15	M	2017-12-14	6.24778
34	Carrier	47		47	2016-09-18	F	2018-03-10	1.47296
35	Carrier	47		47	2016-09-18	M	2018-03-10	1.47296
36	Carrier	48		48	2014-11-02	F	2018-03-10	3.35113
37	Carrier	49		49	2016-10-04	M	2018-03-10	1.42916
38	Carrier	49		49	2016-06-24	F	2018-03-10	1.70842
39	Carrier	45.5		45.5	2014-10-29	M	2018-03-10	3.36208
40	Carrier	50.5		50.5	2010-08-12	M	2018-03-21	7.60575
41	Clear		53.34	53.34	2016-08-25	M	2017-09-14	1.05407
42	Clear		46.8	46.8	2016-10-08	M	2017-10-14	1.01574
43	Clear	50.5		50.5	2011-01-11	F	2017-07-11	6.49692
44	Clear		55.88	55.88	2014-11-05	M	2017-09-26	2.89117
45	Clear		45.72	45.72	2015-04-19	F	2017-09-26	2.43943
46	Clear		45.72	45.72	2015-10-02	F	2017-09-26	1.98494
47	Clear		48.26	48.26	2014-10-26	F	2017-10-18	2.97878
48	Clear	43.5	43.2	43.5	>1 year	F	2017-11-25
49	Clear	47.5	47.63	47.5	2015-08-28	F	2017-11-25	2.24504
50	Clear	48.5	49.53	48.5	2014-03-07	F	2017-11-25	3.72074
51	Clear	46	46.99	46	2014-03-07	F	2017-11-25	3.72074
52	Clear	50.5	48.5	50.5	2016-05-28	F	2017-11-25	1.49487
53	Clear	48	48.2	48	2013-11-11	M	2017-11-25	4.03833
54	Clear	52.5	53.34	52.5	2011-11-25	M	2017-11-25	6.00137
55	Clear	44.5		44.5	2014-01-28	M	2017-11-14	3.79466
56	Clear		51	51	>1 year	M	2017-11-29
57	Clear		44.5	44.5	>1 year	F	2017-11-29
58	Clear	48		48	2015-09-23	F	2017-11-25	2.17385
59	Clear		48	48	2013-05-24	F	2017-12-06	4.53662
60	Clear		49.5	49.5	2016-01-14	F	2017-12-06	1.89459
61	Clear	49.5	52.07	49.5	2016-05-12	F	2017-11-25	1.53867
62	Clear		46.99	46.99	2014-10-13	F	2017-12-14	3.17043
63	Clear	47		47	2014-03-01	F	2018-03-10	4.02464
64	Clear	49.5		49.5	2014-04-23	M	2018-03-10	3.87953
65	Clear	50		50	2014-03-01	F	2018-03-10	4.02464
66	Clear	46.5		46.5	2016-10-04	F	2018-03-10	1.42916
